# Supplementary figures and images for: Complexin induces a conformational change at the membrane-proximal C-terminal end of the SNARE complex
Source: eLife journal article supplement (doi:10.7554/elife.16886), 2016-06-02

Figure 4–figure supplement 1

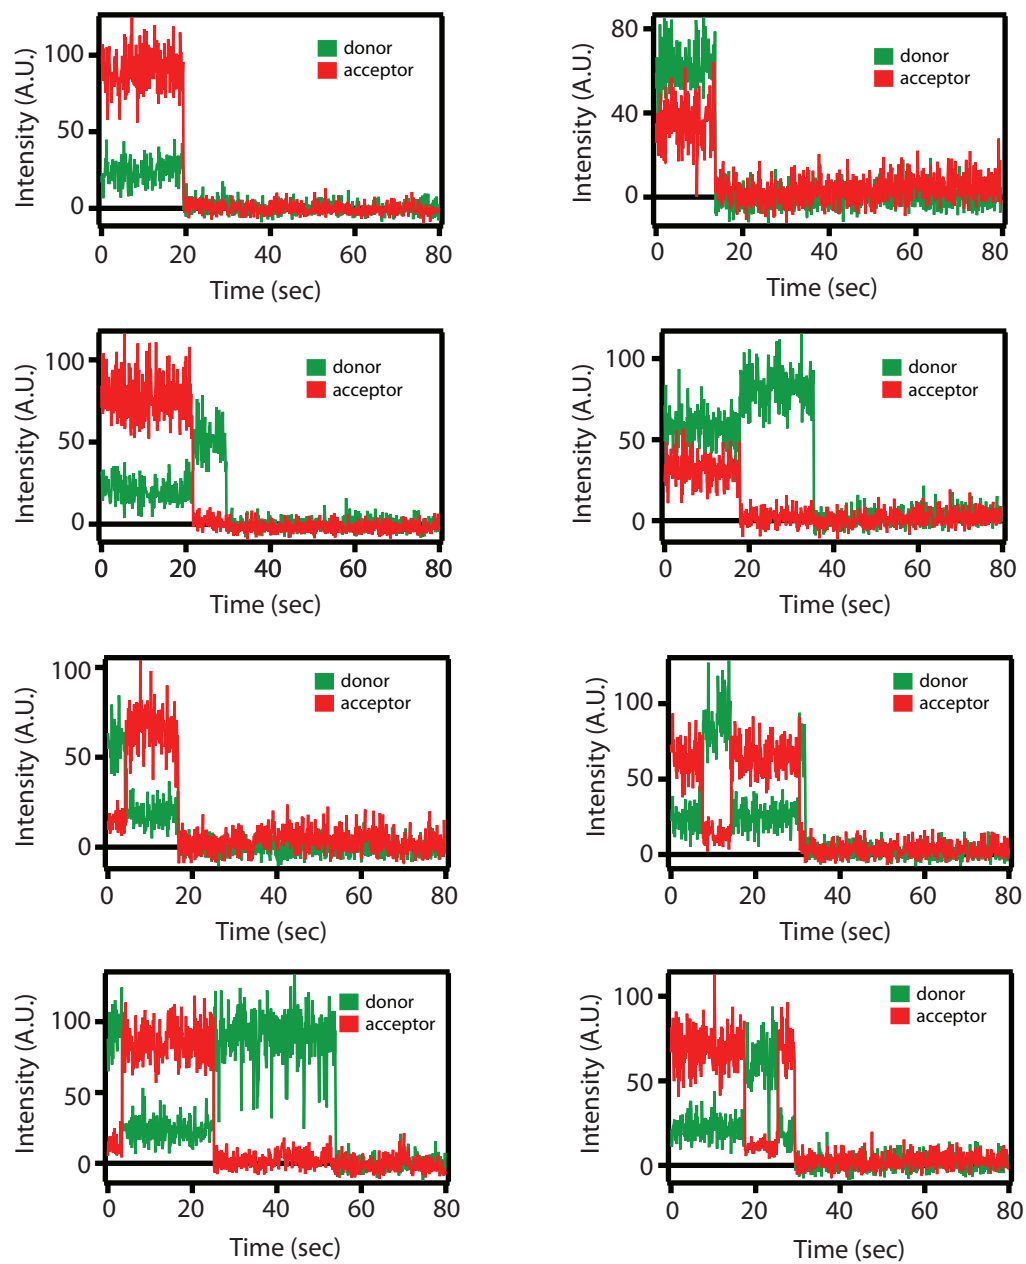

Supplement: supp [file elife-16886-supp-v1.zip]
